# Supplementary material for: Fructooligosaccharide supplementation alleviated the pathological immune response and prevented the impairment of intestinal barrier in DSS-induced acute colitis mice
Source: Royal Society of Chemistry journal article supplement (doi:10.1039/d1fo01147b), 2021-01-01
Supplement: d1fo01147b1.pdf [file d1fo01147b1.pdf]

**cTable s1 Primer sequences for reference and target genes**

| Genes         | Primer sequences (5' to 3')             |
|---------------|-----------------------------------------|
| GAPDH         | forward: TGGTCCTCAGTGTAGCCCAAG          |
|               | reverse: CTGCCAGAACATCATCCCT            |
| Claudin       | forward: AAAGCACCGGGCAGATACAG           |
|               | reverse: ACTAATGTCGCCAGACCTGAA          |
| Occludin      | forward: TCTGACTATGCGGAAAGAGTTG         |
|               | reverse: TCTAGGTTACCATTGCTGCTGT         |
| ZO-1          | forward: CAAAGAAGGCTTAGAGGAAGG          |
|               | reverse: TAGGGAGGTCAAGGAGGAAAA          |
| MUC2          | forward: GACCTCCACCCCTACAAACA           |
|               | reverse: TTGTTCCAGGGGATGATGCT           |
| TNF- $\alpha$ | forward: GCTCCTCCACTTGGTGGTTT           |
|               | reverse: AGGCGGTGCCTATGTCTCAG           |
| IL-4          | forward: TCATCCTGCTCTTCTTTCTCG          |
|               | reverse: CCTTCTCCTGTGACCTCGTT           |
| IL-6          | forward: AGTTGTGCAATGGCAATTCTGA         |
|               | reverse:<br>TCTGGCTTTGTCTTTCTTGTTATCTTT |
| IL-17         | forward: GAGCTTCATCTGTGTCTCTGAT         |
|               | reverse: GCCAAGGGAGTTAAAGACTTTG         |
| IL-10         | forward: GCTCTTACTGACTGGCATGAG          |
|               | reverse: CGCAGCTCTAGGAGCATGTG           |

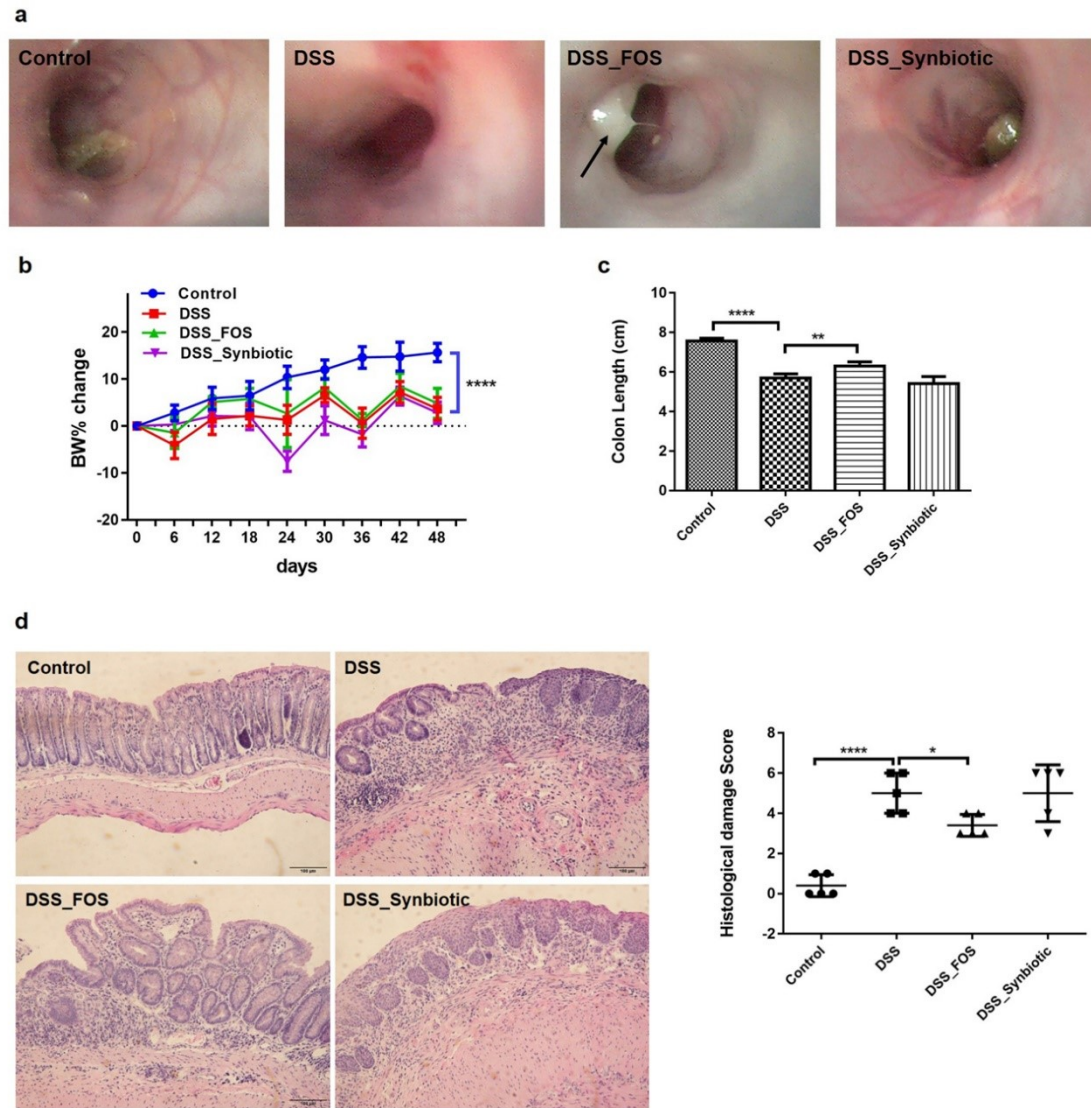

**sFig. 1. The effects of FOS and the synbiotic on chronic colitis mice**

After 3 rounds of 2% DSS administration, the mice underwent colonoscopy examination (a). “Control” represented the control group for chronic colitis group. “DSS”, “DSS\_FOS” and “DSS\_Synbiotic” represented the untreated, FOS-treated and Synbiotic-treated chronic colitis groups respectively. The arrow indicated the mucus accumulated at colon mucosa. The colitis activity in each group mice were evaluated through measurement of body weight change (b), colon length (c) and histological analysis (d). *P* values were analyzed by two-tailed unpaired *t*-test (b, c) or two-tailed unpaired Mann-Whitney test (d). \* *P* < 0.05, \*\* *P* < 0.01, \*\*\*\* *P* < 0.0001, *n* ≥ 5.

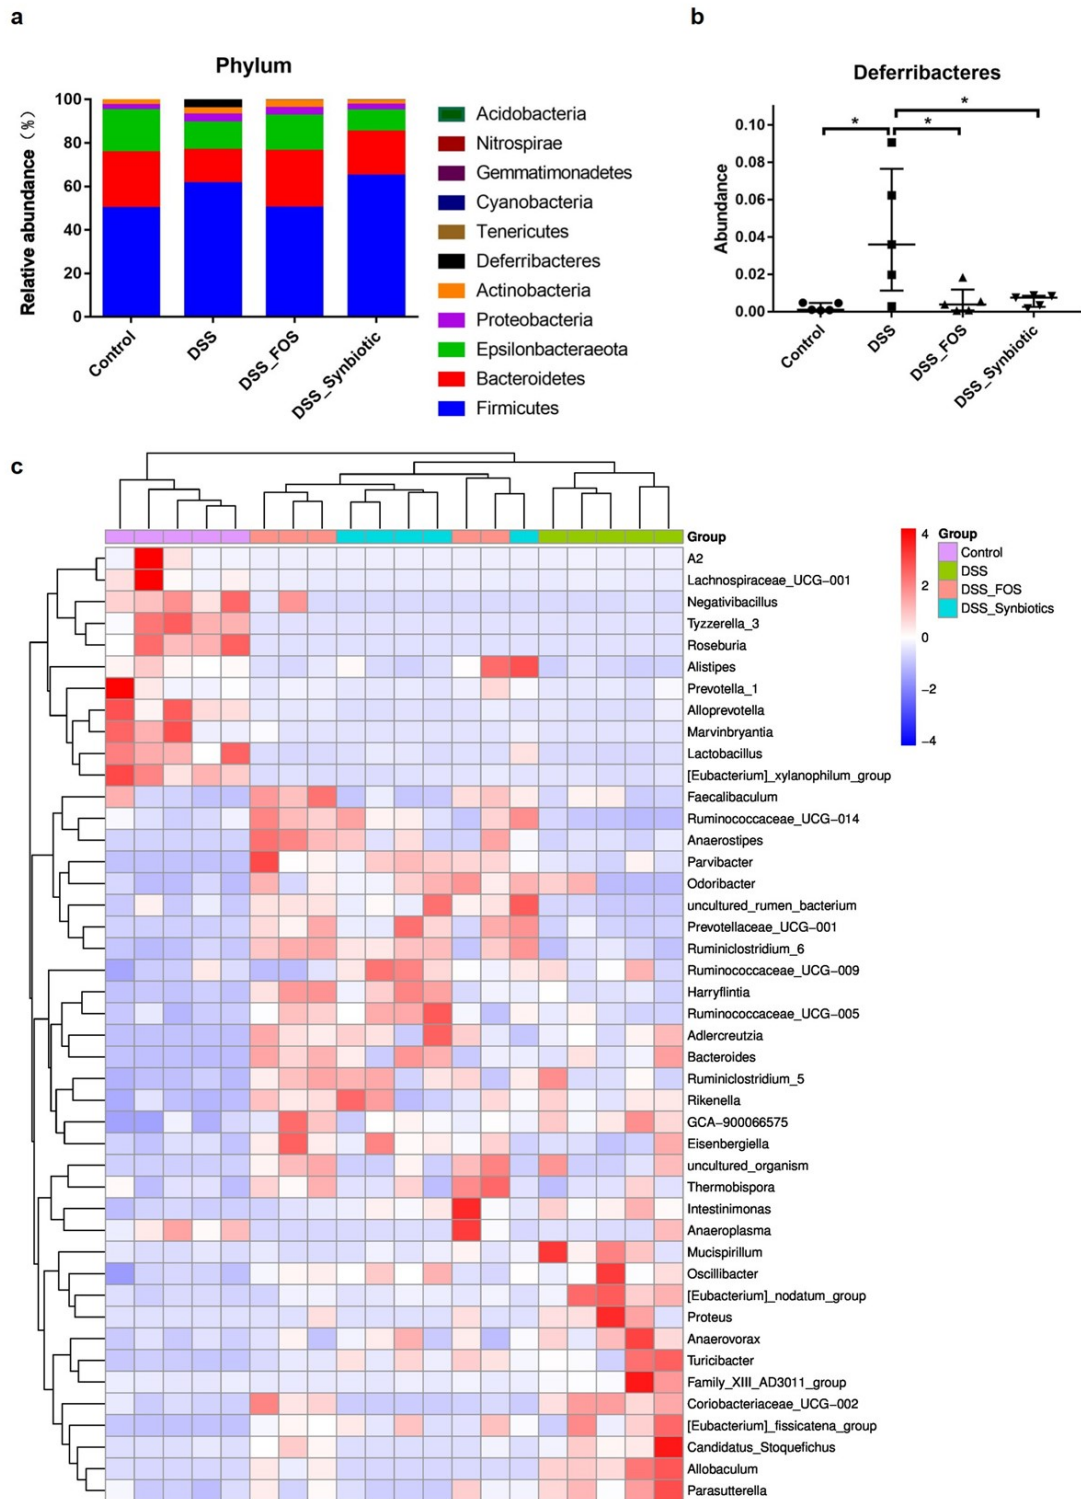

**Fig. 2. The alterations of microbial composition in acute colitis mice**

The microbial composition of colon mucosa was analyzed by 16s rDNA sequencing in each group mice. “Control” represented the control group for acute colitis group. “DSS”, “DSS\_FOS” and “DSS\_Synbiotic” represented the untreated, FOS-treated and Synbiotic-treated acute colitis groups respectively. (a) The microbial composition based on relative abundance at phylum level.

(b) Relative abundance of *Deferribacteres*. The pairwise comparisons were performed by Wilcoxon rank sum test. \*  $P < 0.05$ ,  $n=5$ . (c) Heatmap based on relative abundance at genus level.

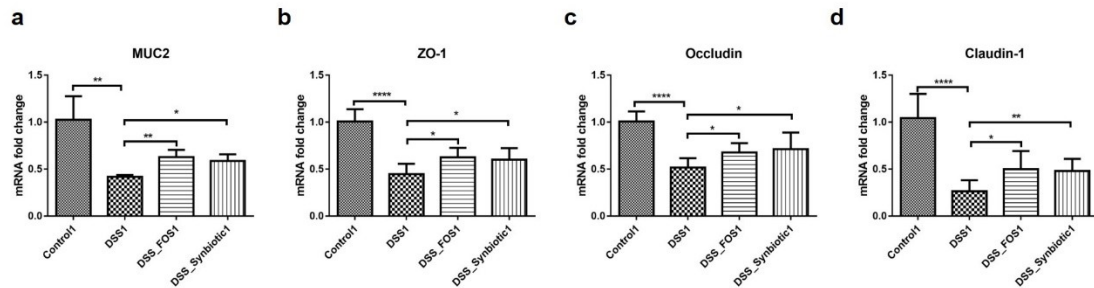

**sFig. 3. mRNA expression of MUC2 and tight junction proteins in acute colitis mice**

The colonic expression of MUC2 (a), ZO-1 (b), Occludin (c), and Claudin-1 (d) in each group mice were examined by quantitative PCR.  $P$  values were analyzed by two-tailed unpaired  $t$ -test (a-d). \*  $P < 0.05$ , \*\*  $P < 0.01$ , \*\*\*  $P < 0.0001$ ,  $n \geq 5$ .
